# Supplementary material for: Selective formation of a stable μ-peroxo ferric heme-CuIIcomplex from the corresponding μ-oxo FeIII–CuIIspecies with hydrogen peroxide
Source: Royal Society of Chemistry journal article supplement (doi:10.1039/b413275k), 2005-01-01
Supplement: b413275k.pdf [file b413275k.pdf]

## Supporting Information

# Selective Formation of a Stable $\mu$ -Peroxo Ferric Heme-Cu<sup>II</sup> Complex from the Corresponding $\mu$ -Oxo Fe<sup>III</sup>-Cu<sup>II</sup> Species with Hydrogen Peroxide

Takefumi Chishiro, Yuichi Shimazaki, Fumito Tani and Yoshinori Naruta\*

Institute for Materials Chemistry and Engineering, Kyushu University,  
6-10-1, Hakozaki, Higashi-ku, Fukuoka 812-8581, Japan  
E-mail: naruta@ms.ifoc.kyushu-u.ac.jp

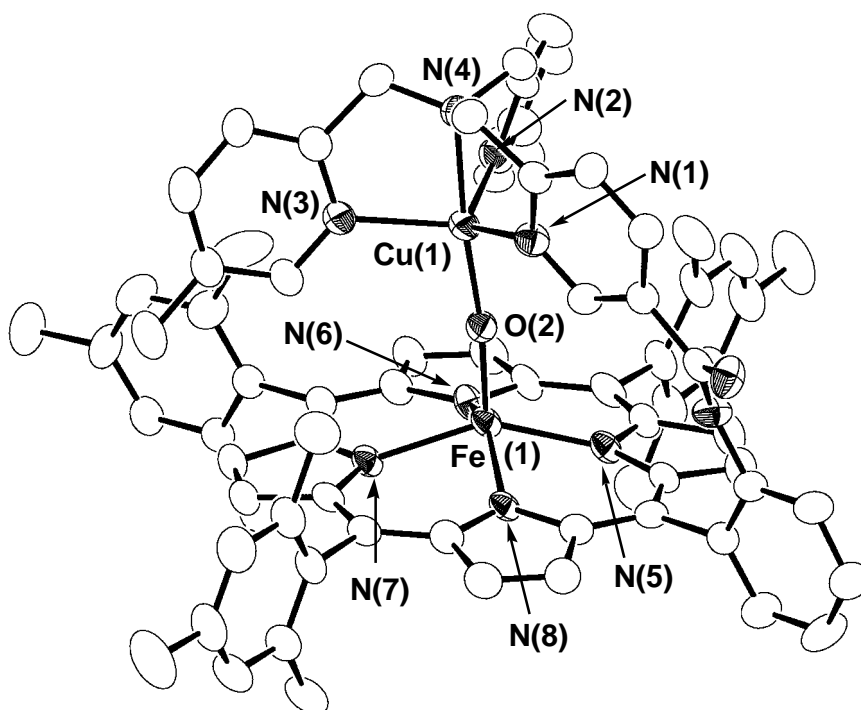

**Fig. S1.** ORTEP view of  $[(\text{TMP})\text{Fe}^{\text{III}}-(\text{O})-(5\text{MeTPA})\text{Cu}^{\text{II}}]^+$  in crystals of **2** drawn with the thermal ellipsoids at the 50 % probability level. All hydrogen atoms were omitted for clarity. Selected bond length [ $\text{\AA}$ ] and angles [deg]: Cu(1)-O(2) 1.856(3), Fe(1)-O(2) 1.758(3), Cu(1)-N(1) 2.069(4), Cu(1)-N(2) 2.079(4), Cu(1)-N(3) 2.144(4), Cu(1)-N(4) 2.095(4), Fe(1)-N(5) 2.121(4), Fe(1)-N(6) 2.113(4), Fe(1)-N(7) 2.106(4), Fe(1)-N(8) 2.119(4), Cu(1)-O(2)-Fe(1) 172.8(2).

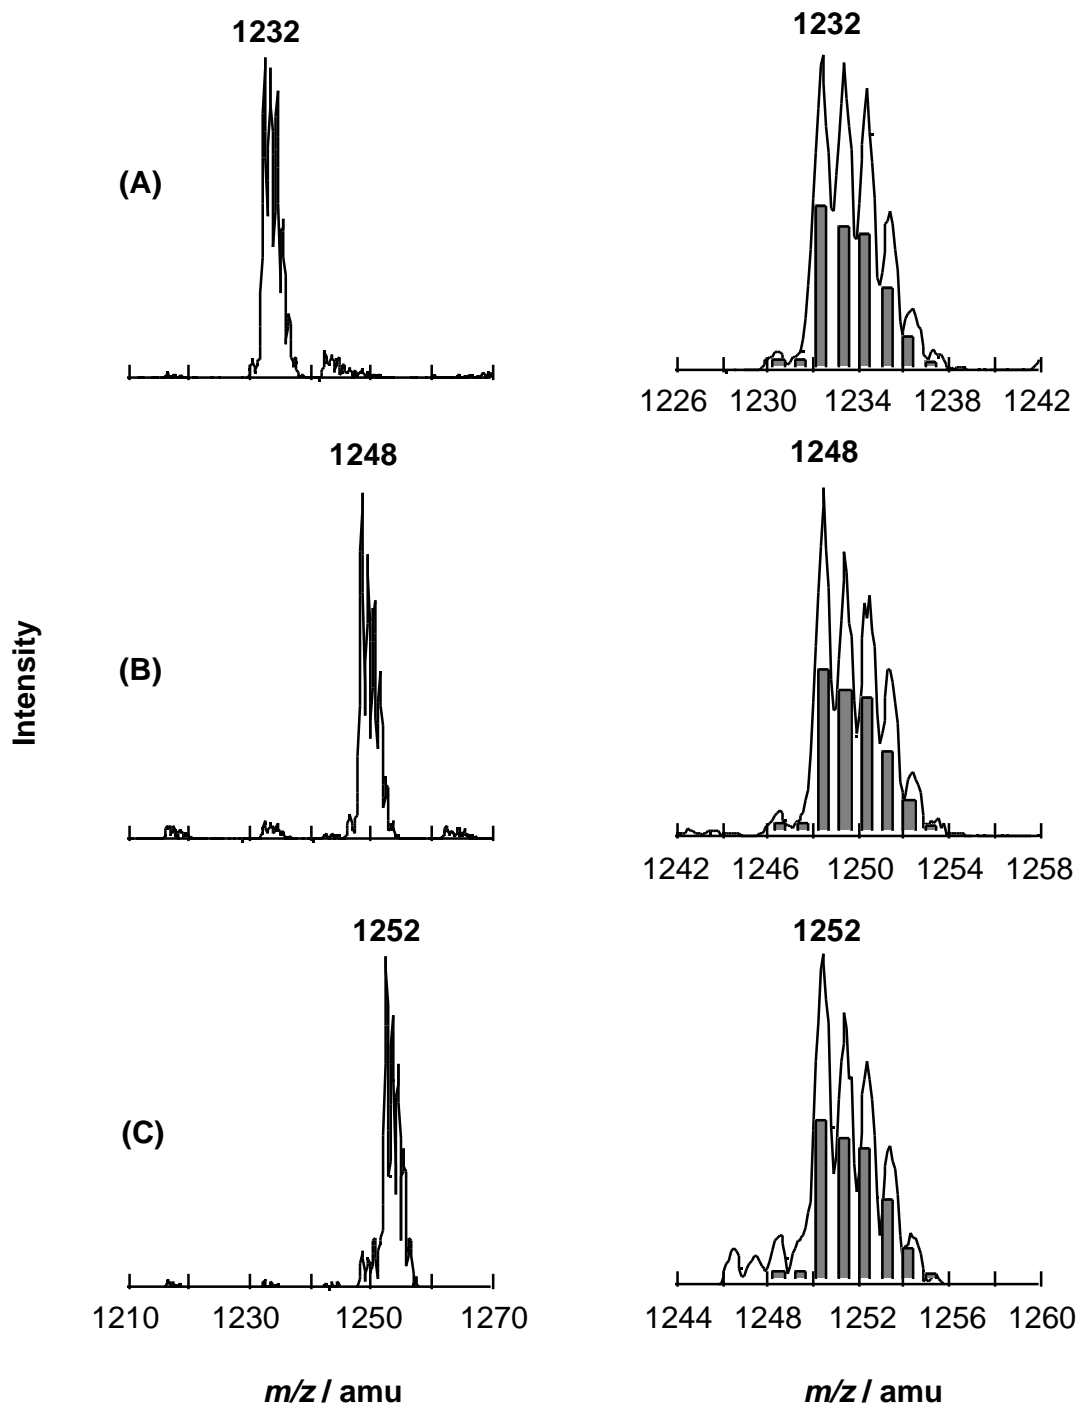

**Fig. S2.** ESI-mass spectra ( $CH_3CN$ , room temperature): (A) **2**, (B) **2** +  $H_2^{16}O_2$  and (C) **2** +  $H_2^{18}O_2$ . The magnified ones are shown in the right side with their simulated isotope patterns in bars.
